# Supplementary material for: Analysis of catastrophic costs incurred by patients with multidrug-resistant tuberculosis in an outpatient clinic in the state of Rio de Janeiro
Source: PubMed Central journal article supplement (PMC10615334; doi:10.1590/0037-8682-0148-2023), 2023-10-30
Supplement: 1678-9849-rsbmt-56-e0148-2023-supp2.pdf [file 1678-9849-rsbmt-56-e0148-2023-supp2.pdf]

| Medical Record | Annual Family Income by IBGE Assets | Annual family income by Total Family Income | Total Direct Costs of Treatment | Total Indirect Treatment | Total Coping Costs | Total Diagnostic Cost | Total Cost Treatment + Diagnosis+Coping | Lost Income TB Treatment | Percentage |
|----------------|-------------------------------------|---------------------------------------------|---------------------------------|--------------------------|--------------------|-----------------------|-----------------------------------------|--------------------------|------------|
| 531493         | 4280.04                             | 12600.00                                    | 16880.04                        | 2010.60                  | 29452.34           | 1000.00               | 65.21                                   | 32528.16                 | 1.93       |
| 529478         | 8891.88                             | 38400.00                                    | 47291.88                        | 2690.00                  | 3715.00            | 100.00                | 212.50                                  | 35177.50                 | 0.74       |
| 531504         | 4280.04                             | 16200.00                                    | 20480.04                        | 359.50                   | 23639.06           | 200.00                | 63.28                                   | 24261.84                 | 1.18       |
| 531049         | 6472.68                             | 31800.00                                    | 38272.68                        | 1970.10                  | 6045.31            | 0.00                  | 8134.11                                 | 8134.11                  | 0.21       |
| 533140         | 8891.88                             | 52920.00                                    | 59183.88                        | 180.00                   | 20104.65           | 300.00                | 191.67                                  | 20776.32                 | 0.35       |
| 515631         | 4280.04                             | 22800.00                                    | 27080.04                        | 1029.20                  | 4332.81            | 0.00                  | 10.42                                   | 3293.20                  | -0.12      |
| 169993         | 22042.08                            | 216000.00                                   | 238042.08                       | 8880.50                  | 7171.88            | 0.00                  | 122.50                                  | 15674.88                 | 0.07       |
| 531736         | 6472.68                             | 31200.00                                    | 37672.68                        | 1408.20                  | 78015.10           | 40.00                 | 18.75                                   | 79482.05                 | 2.11       |
| 533073         | 8891.88                             | 24000.00                                    | 30472.68                        | 448.30                   | 19395.23           | 0.00                  | 55.45                                   | 19898.98                 | 0.65       |
| 534602         | 6472.68                             | 24000.00                                    | 30472.68                        | 3977.50                  | 25077.52           | 100.00                | 719.20                                  | 29874.22                 | 0.59       |
| 530143         | 8891.88                             | 182400.00                                   | 204442.08                       | 3365.60                  | 1184.90            | 400.00                | 39.30                                   | 4989.80                  | 0.16       |
| 597488         | 8891.88                             | 62400.00                                    | 71291.88                        | 2709.30                  | 97107.81           | 0.00                  | 103.13                                  | 99920.24                 | 1.40       |
| 534022         | 6472.68                             | 24000.00                                    | 30472.68                        | 3234.20                  | 8542.97            | 0.00                  | 802.50                                  | 12579.67                 | 0.18       |
| 709364         | 6472.68                             | 25200.00                                    | 31672.68                        | 770.10                   | 26755.21           | 500.00                | 10.42                                   | 28035.73                 | 0.92       |
| 715666         | 9088.32                             | 36000.00                                    | 45088.32                        | 2765.20                  | 34392.71           | 120.00                | 73.75                                   | 38001.66                 | 1.20       |
| 711886         | 6472.68                             | 24000.00                                    | 30472.68                        | 1282.00                  | 4476.56            | 40.00                 | 147.00                                  | 5945.56                  | 0.13       |
| 707342         | 8891.88                             | 48000.00                                    | 56891.88                        | 4200.00                  | 375.00             | 0.00                  | 53.30                                   | 4628.30                  | 0.15       |
| 525454         | 4280.04                             | 16800.00                                    | 21080.04                        | 2061.90                  | 8825.00            | 0.00                  | 126.68                                  | 11013.58                 | 0.19       |
| 723009         | 4280.04                             | 20400.00                                    | 25880.04                        | 533.40                   | 3514.58            | 0.00                  | 54.88                                   | 4102.87                  | 0.19       |
| 520759         | 8891.88                             | 36000.00                                    | 44891.88                        | 3302.60                  | 28265.63           | 50.00                 | 15.63                                   | 31633.85                 | 1.22       |
| 529354         | 4280.04                             | 21600.00                                    | 25880.04                        | 2200.90                  | 159.38             | 500.00                | 39.93                                   | 2900.20                  | 0.12       |
| 528150         | 4280.04                             | 17760.00                                    | 2040.04                         | 4725.90                  | 93604.17           | 0.00                  | 53.13                                   | 98383.20                 | 2.19       |
| 534647         | 6472.68                             | 30000.00                                    | 36472.68                        | 3624.00                  | 3670.31            | 1000.00               | 190.00                                  | 8484.31                  | 0.33       |
| 718860         | 12429.48                            | 84000.00                                    | 96429.48                        | 8209.60                  | 4357.03            | 600.00                | 1849.38                                 | 15016.01                 | 0.86       |
| 534022         | 8891.88                             | 38160.00                                    | 47051.88                        | 3955.10                  | 23125.47           | 100.00                | 56.51                                   | 27377.08                 | 1.24       |
| 535574         | 4280.04                             | 15600.00                                    | 19880.04                        | 819.80                   | 22178.91           | 0.00                  | 375.31                                  | 23374.02                 | 0.64       |
| 540114         | 8891.88                             | 67200.00                                    | 76091.88                        | 6740.00                  | -15828.13          | 0.00                  | 2160.00                                 | -6928.13                 | -0.07      |
| 540113         | 12429.48                            | 84000.00                                    | 96429.48                        | 2763.00                  | 50327.34           | 2600.00               | 37.50                                   | 49133.53                 | 1.04       |
| 7292929        | 6472.68                             | 26400.00                                    | 32872.68                        | 10053.30                 | 36242.73           | 0.00                  | 1044.40                                 | 54134.74                 | 1.65       |
| 724407         | 8891.88                             | 57600.00                                    | 66491.88                        | 5879.45                  | 44093.75           | 0.00                  | 93.75                                   | 49866.95                 | 1.11       |
| 704394         | 4280.04                             | 15600.00                                    | 19880.04                        | 3720.00                  | 7021.59            | 0.00                  | 821.58                                  | 11563.18                 | 0.58       |
| 704949         | 8891.88                             | 40140.00                                    | 49031.88                        | 18196.30                 | 18196.30           | 150.00                | 141.18                                  | 22588.68                 | 0.46       |
| 728290         | 12429.48                            | 75240.00                                    | 87669.48                        | 1033.40                  | 45699.32           | 0.00                  | 517.85                                  | 47250.57                 | 0.54       |
| 728009         | 15576.60                            | 144000.00                                   | 159576.60                       | 7840.10                  | 8968.13            | 0.00                  | 310.00                                  | 17118.23                 | 0.11       |
| 727545         | 8891.88                             | 58200.00                                    | 67091.88                        | 2252.80                  | -7381.64           | 0.00                  | 298.83                                  | -4830.02                 | -0.07      |
| 703225         | 6472.68                             | 30000.00                                    | 36472.68                        | 4932.00                  | 17887.50           | 30.00                 | 88.08                                   | 22937.58                 | 0.63       |
| 703296         | 4280.04                             | 4104.00                                     | 8384.04                         | 864.20                   | 10636.59           | 100.00                | 26.25                                   | 11627.04                 | 1.39       |
| 726115         | 6472.68                             | 24540.00                                    | 31012.68                        | 760.00                   | 19817.81           | 0.00                  | 271.98                                  | 20849.80                 | 0.67       |
| 730283         | 8891.88                             | 42540.00                                    | 51431.88                        | 840.00                   | 100942.62          | 850.00                | 95.13                                   | 102727.74                | 2.00       |
| 728433         | 4280.04                             | 12540.00                                    | 16820.04                        | 1168.80                  | 9690.74            | 0.00                  | 10.89                                   | 10870.43                 | 0.65       |
| 733325         | 6472.68                             | 31200.00                                    | 37672.68                        | 1604.00                  | 22647.66           | 200.00                | 120.83                                  | 24572.49                 | 0.65       |
| 728844         | 6472.68                             | 25080.00                                    | 31552.68                        | 5081.00                  | 3202.27            | 400.00                | 10.89                                   | 8694.15                  | 0.28       |
| 738071         | 4280.04                             | 3600.00                                     | 7880.04                         | 693.00                   | 7375.83            | 30.00                 | 8.10                                    | 8106.93                  | 1.03       |
| 521335         | 4280.04                             | 3600.00                                     | 7880.04                         | 1900.00                  | 386.72             | 1500.00               | 0.00                                    | 3786.72                  | 0.48       |
| 536292         | 4280.04                             | 14940.00                                    | 19220.04                        | 1440.00                  | 39654.38           | 200.00                | 10.89                                   | 41305.26                 | 2.15       |
| 723258         | 6472.68                             | 25200.00                                    | 31672.68                        | 2160.90                  | 96127.76           | 0.00                  | 103.33                                  | 11876.99                 | 0.37       |
| 728401         | 4280.04                             | 18000.00                                    | 22280.04                        | 162.00                   | 2285.16            | 400.00                | 32.81                                   | 2879.97                  | 0.13       |
| 735294         | 22042.08                            | 240000.00                                   | 262042.08                       | 315.90                   | 245507.81          | 0.00                  | 156.25                                  | 245979.96                | 0.94       |
| 735295         | 8891.88                             | 43200.00                                    | 52091.88                        | 2997.60                  | 21778.13           | 0.00                  | 723.13                                  | 25498.85                 | 0.49       |
| 735296         | 6472.68                             | 24960.00                                    | 31432.68                        | 2438.20                  | 2946.67            | 20.00                 | 40.00                                   | 5444.87                  | 0.17       |
| 735297         | 4280.04                             | 14400.00                                    | 18680.04                        | 2414.60                  | 43200.00           | 50.00                 | 512.50                                  | 46177.10                 | 2.47       |
| 526309         | 4280.04                             | 13200.00                                    | 17480.04                        | 0.00                     | 309.38             | 0.00                  | 664.58                                  | 973.96                   | 0.06       |
| 526308         | 8891.88                             | 64800.00                                    | 73691.88                        | 3401.40                  | 150768.75          | 0.00                  | 466.25                                  | 154636.40                | 2.10       |
| 471527         | 8891.88                             | 34800.00                                    | 43691.88                        | 3704.60                  | 22731.25           | 0.00                  | 105.21                                  | 26541.06                 | 0.61       |
| 471526         | 8891.88                             | 58800.00                                    | 67691.88                        | 3299.10                  | 6660.94            | 0.00                  | 377.33                                  | 10337.37                 | 0.15       |
| 530021         | 6472.68                             | 30000.00                                    | 36472.68                        | 3744.00                  | 5683.59            | 0.00                  | 250.19                                  | 9677.78                  | 0.27       |
| 530020         | 8891.88                             | 42000.00                                    | 50891.88                        | 2869.60                  | 19057.81           | 0.00                  | 172.50                                  | 22099.91                 | 0.43       |
